# Supplementary material
Source: Springer Nature journal article supplement (https://www.springermedizin.de/resource/supplementary/12911_2007_199_MOESM5_ESM.pdf/9527358)

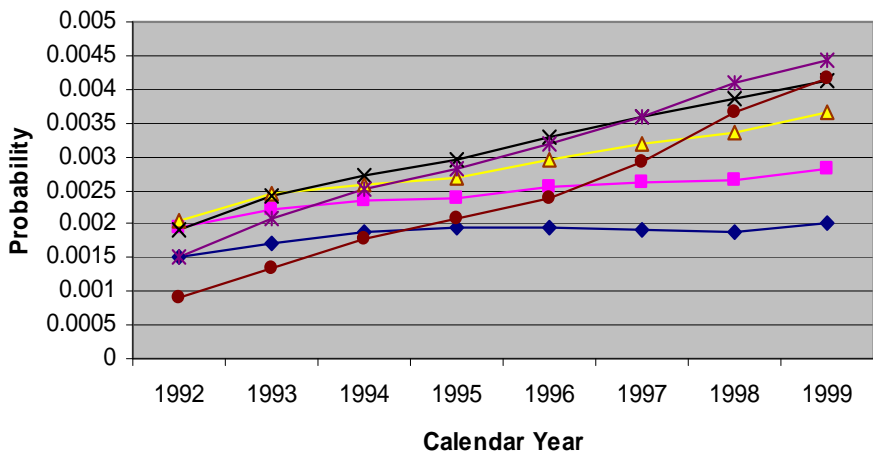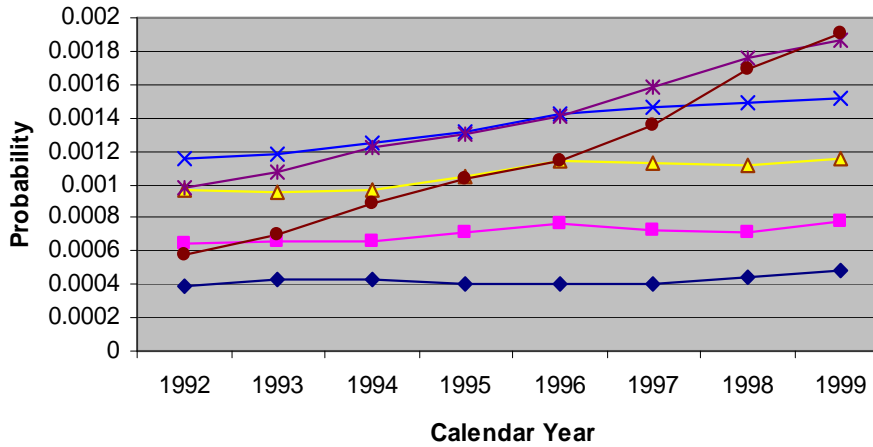

Supplement: MOESM5 [file 9527358]
